# Supplementary material for: Characterization of Serum and Mucosal SARS-CoV-2-Antibodies in HIV-1-Infected Subjects after BNT162b2 mRNA Vaccination or SARS-CoV-2 Infection
Source: Viruses. 2022 Mar 21;14(3):651. doi: 10.3390/v14030651 (PMC8952283; doi:10.3390/v14030651)
Supplement: Supplementary file 1 [file viruses-14-00651-s001.zip › Suppl. Table S1.pdf]

**Supplementary Table S1: Characteristics of study subjects**

| ID  | Sex | Age | COVID | Severity | Vaccination | Days between doses | Days post Boost/<br>Infection | HIV-<br>Infection | Years infected | Years under therapy | Viral load | Therapy            | CD4+ T-cells | CD8+ T-cells | Comorbidities         |
|-----|-----|-----|-------|----------|-------------|--------------------|-------------------------------|-------------------|----------------|---------------------|------------|--------------------|--------------|--------------|-----------------------|
| 224 | M   | 44  | N     |          | N           |                    |                               | Y                 | 8              | 8                   | <20        | FTC/TAF/RPV        | 429          | 568          | HyT                   |
| 539 | F   | 36  | N     |          | N           |                    |                               | Y                 | 5              | 5                   | 30         | DRV, RTV, DTG, FTC | 468          | 684          | N                     |
| 93  | M   | 35  | N     |          | N           |                    |                               | Y                 | 5              | 5                   | <20        | FTC/TAF/BIC        | 921          | 1020         | PCBCL 2015, ASCT 2016 |
| 540 | M   | 54  | N     |          | N           |                    |                               | Y                 | 9              | 9                   | <20        | FTC/TAF/BIC        | 642          | 489          | N                     |
| 356 | M   | 34  | N     |          | N           |                    |                               | Y                 | 1              | 1                   | <20        | FTC/TAF/BIC        | 499          | 1189         | N                     |
| 70  | M   | 56  | N     |          | N           |                    |                               | Y                 | 29             | 24                  | 20         | FTC/TAF/COB /EVG   | 728          | 664          | N                     |
| 254 | F   | 44  | N     |          | Y           | 21                 | 34                            | N                 |                |                     |            | None               | N/A          | N/A          | N <sup>1</sup>        |
| 264 | M   | 35  | N     |          | Y           | 21                 | 9                             | N                 |                |                     |            | None               | N/A          | N/A          | N                     |
| 269 | M   | 60  | N     |          | Y           | 21                 | 14                            | N                 |                |                     |            | None               | N/A          | N/A          | N                     |
| 265 | F   | 27  | N     |          | Y           | 21                 | 14                            | N                 |                |                     |            | None               | N/A          | N/A          | N                     |
| 268 | F   | 32  | N     |          | Y           | 21                 | 14                            | N                 |                |                     |            | None               | N/A          | N/A          | N                     |
| 266 | F   | 43  | N     |          | Y           | 21                 | 14                            | N                 |                |                     |            | None               | N/A          | N/A          | N                     |
| 267 | M   | 25  | N     |          | Y           | 21                 | 14                            | N                 |                |                     |            | None               | N/A          | N/A          | N                     |
| 271 | F   | 56  | N     |          | Y           | 26                 | 23                            | N                 |                |                     |            | None               | N/A          | N/A          | N                     |
| 270 | M   | 61  | N     |          | Y           | 21                 | 36                            | N                 |                |                     |            | None               | N/A          | N/A          | N                     |
| 6   | F   | 25  | N     |          | Y           | 21                 | 17                            | N                 |                |                     |            | None               | N/A          | N/A          | N                     |

| ID  | Sex | Age | COVID | Severity | Vaccination | Days between doses | Days post Boost/ Infection | HIV- Infection | Years infected | Years under therapy | Viral load | Therapy          | CD4+ T-cells | CD8+ T-cells | Comorbidities |
|-----|-----|-----|-------|----------|-------------|--------------------|----------------------------|----------------|----------------|---------------------|------------|------------------|--------------|--------------|---------------|
| 272 | F   | 23  | N     |          | Y           | 21                 | 20                         | N              |                |                     |            | None             | N/A          | N/A          | N             |
| 8   | F   | 44  | N     |          | Y           | 21                 | 17                         | N              |                |                     |            | None             | N/A          | N/A          | N             |
| 5   | F   | 60  | N     |          | Y           | 21                 | 20                         | N              |                |                     |            | None             | N/A          | N/A          | N             |
| 15  | F   | 23  | N     |          | Y           | 21                 | 78                         | N              |                |                     |            | None             | N/A          | N/A          | N             |
| 2   | M   | 60  | N     |          | Y           | 21                 | 119                        | N              |                |                     |            | None             | N/A          | N/A          | N             |
| 526 | M   | 80  | N     |          | Y           | 21                 | 8                          | Y              | 22             | 22                  | <20        | FTC/TAF/BIC      | 795          | 1481         | AF, CHD       |
| 56  | F   | 58  | N     |          | Y           | 21                 | 20                         | Y              | 25             | 19                  | <20        | FTC/TAF/COB /EVG | 578          | 561          | N             |
| 74  | M   | 32  | N     |          | Y           | 21                 | 60                         | Y              | 7              | 7                   | <20        | FTC/TAF/BIC      | 928          | 1228         | N             |
| 232 | F   | 63  | N     |          | Y           | 21                 | 16                         | Y              | 32             | 15                  | <20        | 3TC/ABC/DTG      | 694          | 642          | CT, HPT       |
| 383 | M   | 36  | N     |          | Y           | 22                 | 98                         | Y              | 6              | 6                   | 20         | FTC/TAF/COB /EVG | 368          | 1067         | N             |
| 275 | M   | 52  | N     |          | Y           | 35                 | 16                         | Y              | 19             | 5                   | 20         | FTC/TAF/BIC      | 904          | 1440         | N             |
| 420 | F   | 63  | N     |          | Y           | 21                 | 111                        | Y              | 35             | 19                  | <20        | FTC/TAF/COB /EVG | 426          | 586          | OULD          |
| 45  | M   | 68  | N     |          | Y           | 42                 | 8                          | Y              | 17             | 17                  | <20        | FTC/TAF/COB /EVG | 473          | 311          | CHD           |
| 496 | M   | 52  | N     |          | Y           | 43                 | 19                         | Y              | 11             | 11                  | 20         | FTC/TAF/COB /DRV | 1443         | 1948         | BL            |
| 240 | M   | 54  | N     |          | Y           | 21                 | 38                         | Y              | 16             | 16                  | <20        | ABC/3TC, EFV     | 905          | 861          | N             |
| 503 | M   | 58  | N     |          | Y           | 43                 | 28                         | Y              | ½              | ½                   | 30         | DTG, FTC/TDF     | 300          | 1321         | N             |
| 98  | M   | 55  | N     |          | Y           | 42                 | 43                         | Y              | 10             | 9                   | <20        | ABC/3TC/DTG      | 555          | 685          | N             |

| ID  | Sex | Age | COVID | Severity | Vaccination | Days<br>between<br>doses | Days post<br>Boost/<br>Infection | HIV-<br>Infection | Years<br>infected | Years<br>under<br>therapy | Viral<br>load | Therapy                  | CD4+<br>T-cells | CD8+<br>T-cells | Comorbidities |
|-----|-----|-----|-------|----------|-------------|--------------------------|----------------------------------|-------------------|-------------------|---------------------------|---------------|--------------------------|-----------------|-----------------|---------------|
| 390 | M   | 68  | N     |          | Y           | 21                       | 75                               | Y                 | 5                 | 5                         | 20            | FTC/TAF/COB<br>/DRV, DTG | 343             | 566             | DM2           |
| 289 | M   | 36  | N     |          | Y           | 42                       | 22                               | Y                 | 4                 | 4                         | <20           | FTC/TAF/BIC              | 596             | 522             | N             |
| 436 | M   | 65  | N     |          | Y           | 42                       | 35                               | Y                 | 4                 | 4                         | 20            | FTC/TAF/BIC              | 335             | 658             | COPD, PAOD    |
| 396 | M   | 60  | N     |          | Y           | 42                       | 76                               | Y                 | 7                 | 7                         | 20            | FTC/TAF/BIC              | 234             | 1042            | DM2, SA       |
| 218 | M   | 61  | N     |          | Y           | 42                       | 62                               | Y                 | 8                 | 8                         | <20           | DRV, RTV,<br>ABC/3TC/DTG | 269             | 517             | N             |
| 297 | M   | 60  | N     |          | Y           | 42                       | 61                               | Y                 | 4                 | 4                         | 20            | ABC/3TC/DTG              | 266             | 108             | N             |
| 441 | M   | 44  | N     |          | Y           | 40                       | 155                              | Y                 | 2                 | 2                         | 20            | FTC/TAF/BIC              | 31              | 448             | N             |
| 256 | M   | 29  | Y     | 3        | N           |                          | 100                              | N                 |                   |                           |               | None                     | N/A             | N/A             | N             |
| 263 | M   | 35  | Y     | 2        | N           |                          | 72                               | N                 |                   |                           |               | None                     | N/A             | N/A             | N             |
| 565 | M   | 32  | Y     | 2        | N           |                          | 107                              | N                 |                   |                           |               | None                     | N/A             | N/A             | N             |
| 566 | M   | 34  | Y     | 2        | N           |                          | 179                              | N                 |                   |                           |               | None                     | N/A             | N/A             | N             |
| 567 | F   | 36  | Y     | 3        | N           |                          | 154                              | N                 |                   |                           |               | None                     | N/A             | N/A             | N             |
| 307 | M   | 25  | Y     | 3        | Y           |                          | 158                              | N                 |                   |                           |               | None                     | N/A             | N/A             | N             |
| 568 | M   | 49  | Y     | 3        | N           |                          | 77                               | N                 |                   |                           |               | None                     | N/A             | N/A             | N             |
| 569 | F   | 50  | Y     | 3        | N           |                          | 77                               | N                 |                   |                           |               | None                     | N/A             | N/A             | N             |
| 113 | M   | 63  | Y     | 1        | Y           | 2d post 1st<br>dose      | 199                              | Y                 | 23                | 23                        | <20           | FTC/TAF/BIC              | 563             | 1028            | N             |
| 334 | M   | 31  | Y     | 3        | N           |                          | 103                              | Y                 | 2                 | 2                         | 20            | DTG,<br>FTC/TDF          | 350             | 665             | N             |

| ID  | Sex | Age | COVID | Severity | Vaccination | Days<br>between<br>doses | Days post<br>Boost/<br>Infection | HIV-<br>Infection | Years<br>infected | Years<br>under<br>therapy | Viral<br>load | Therapy                  | CD4+<br>T-cells | CD8+<br>T-cells | Comorbidities |
|-----|-----|-----|-------|----------|-------------|--------------------------|----------------------------------|-------------------|-------------------|---------------------------|---------------|--------------------------|-----------------|-----------------|---------------|
| 532 | M   | 28  | Y     | 3        | N           |                          | 51                               | Y                 | 8                 | 8                         | <20           | FTC/TDF/RPV              | 814             | 668             | AA            |
| 501 | M   | 41  | Y     | 3        | N           |                          | 73                               | Y                 | 23                | 16                        | <20           | FTC/TAF/BIC              | 44              | 84              | LCpH          |
| 230 | F   | 31  | Y     | 3        | N           |                          | 136                              | Y                 | 7                 | 7                         | <20           | FTC/TDF/RPV              | 688             | 946             | N             |
| 120 | M   | 46  | Y     | 2        | N           |                          | 153                              | Y                 | 5                 | 5                         | <20           | FTC/TAF/BIC              | 538             | 723             | N             |
| 178 | M   | 45  | Y     | 3        | N           |                          | 57                               | Y                 | 4                 | 4                         | 20            | 3TC/ABC/DTG              | 470             | 632             | N             |
| 492 | F   | 41  | Y     | 1        | N           |                          | 38                               | Y                 | 12                | 12                        | <20           | FTC/TAF/COB<br>/DRV, DTG | 505             | 379             | N             |
| 491 | M   | 50  | Y     | 4        | N           |                          | 93                               | Y                 | 23                | 23                        | <20           | ETR, RAL,<br>DRV, RTV    | 274             | 440             | HbH           |
| 422 | F   | 66  | Y     | 2        | N           |                          | 28                               | Y                 | 25                | 11                        | <20           | ABC/3TC,<br>RAL          | 625             | 447             | CC            |
| 552 | M   | 52  | Y     | 2        | N           |                          | 175                              | Y                 | 16                | 16                        | <20           | FTC/TAF/BIC              | 341             | 458             | N             |
| 260 | M   | 49  | Y     | 2        | N           |                          | 164                              | Y                 | 2                 | 2                         | <20           | FTC/TAF/BIC              | 405             | 778             | N             |
| 564 | F   | 25  | Y     | 2        | N           |                          | 59                               | Y                 | 1                 | 1                         | <20           | FTC/TAF,<br>DTG          | 210             | 360             | DM1           |
| 1   | F   | 61  | N     |          | Y           | 21                       | 14                               | N                 |                   |                           |               | None                     | N/A             | N/A             | N             |
| 247 | M   | 38  | N     |          | Y           | 21                       | 15                               | N                 |                   |                           |               | None                     | N/A             | N/A             | N             |
| 248 | M   | 53  | N     |          | Y           | 21                       | 15                               | N                 |                   |                           |               | None                     | N/A             | N/A             | N             |
| 251 | M   | 61  | N     |          | Y           | 21                       | 16                               | N                 |                   |                           |               | None                     | N/A             | N/A             | N             |
| 252 | F   | 54  | N     |          | Y           | 21                       | 9                                | N                 |                   |                           |               | None                     | N/A             | N/A             | N             |
| 9   | M   | 23  | N     |          | Y           | 21                       | 21                               | N                 |                   |                           |               | None                     | N/A             | N/A             | N             |

| ID   | Sex | Age | COVID | Severity | Vaccination | Days<br>between<br>doses | Days post<br>Boost/<br>Infection | HIV-<br>Infection | Years<br>infected | Years<br>under<br>therapy | Viral<br>load | Therapy | CD4+<br>T-cells | CD8+<br>T-cells | Comorbidities |
|------|-----|-----|-------|----------|-------------|--------------------------|----------------------------------|-------------------|-------------------|---------------------------|---------------|---------|-----------------|-----------------|---------------|
| 514  | F   | 48  | N     |          | Y           | 21                       | 27                               | N                 |                   |                           |               | None    | N/A             | N/A             | N             |
| 516  | F   | 50  | N     |          | Y           | 22                       | 68                               | N                 |                   |                           |               | None    | N/A             | N/A             | N             |
| 517  | F   | 45  | N     |          | Y           | 21                       | 68                               | N                 |                   |                           |               | None    | N/A             | N/A             | N             |
| 528  | M   | 30  | N     |          | Y           | 23                       | 20                               | N                 |                   |                           |               | None    | N/A             | N/A             | N             |
| 475  | F   | 37  | N     |          | Y           | 23                       | 23                               | N                 |                   |                           |               | None    | N/A             | N/A             | N             |
| 580  | M   | 53  | N     |          | Y           | 28                       | 37                               | N                 |                   |                           |               | None    | N/A             | N/A             | N             |
| 4083 | F   | 23  | N     |          | Y           | 32                       | 20                               | N                 |                   |                           |               | None    | N/A             | N/A             | N             |
| 4439 | F   | 30  | N     |          | Y           | 42                       | 23                               | N                 |                   |                           |               | None    | N/A             | N/A             | N             |
| 3012 | F   | 34  | N     |          | Y           | 42                       | 46                               | N                 |                   |                           |               | None    | N/A             | N/A             | N             |
| 3865 | F   | 68  | N     |          | Y           | 42                       | 22                               | N                 |                   |                           |               | None    | N/A             | N/A             | N             |
| 3815 | F   | 54  | N     |          | Y           | 49                       | 76                               | N                 |                   |                           |               | None    | N/A             | N/A             | N             |
| 4402 | F   | 47  | N     |          | Y           | 36                       | 114                              | N                 |                   |                           |               | None    | N/A             | N/A             | N             |
| 2918 | M   | 27  | N     |          | Y           | N/A                      | 59                               | N                 |                   |                           |               | None    | N/A             | N/A             | N             |
| 4628 | M   | 34  | N     |          | Y           | 42                       | 62                               | N                 |                   |                           |               | None    | N/A             | N/A             | N             |
| 908  | M   | 35  | N     |          | Y           | 42                       | 87                               | N                 |                   |                           |               | None    | N/A             | N/A             | N             |
| 3827 | M   | 40  | N     |          | Y           | 27                       | 49                               | N                 |                   |                           |               | None    | N/A             | N/A             | N             |
| 89   | M   | 44  | N     |          | Y           | 42                       | 155                              | N                 |                   |                           |               | None    | N/A             | N/A             | N             |

| ID   | Sex | Age | COVID | Severity | Vaccination | Days<br>between<br>doses | Days post<br>Boost/<br>Infection | HIV-<br>Infection | Years<br>infected | Years<br>under<br>therapy | Viral<br>load | Therapy | CD4+<br>T-cells | CD8+<br>T-cells | Comorbidities |
|------|-----|-----|-------|----------|-------------|--------------------------|----------------------------------|-------------------|-------------------|---------------------------|---------------|---------|-----------------|-----------------|---------------|
| 770  | M   | 45  | N     |          | Y           | 22                       | 25                               | N                 |                   |                           |               | None    | N/A             | N/A             | N             |
| 773  | M   | 53  | N     |          | Y           | 23                       | 29                               | N                 |                   |                           |               | None    | N/A             | N/A             | N             |
| 781  | M   | 48  | N     |          | Y           | 22                       | 43                               | N                 |                   |                           |               | None    | N/A             | N/A             | N             |
| 9240 | M   | 41  | N     |          | Y           | 42                       | 77                               | N                 |                   |                           |               | None    | N/A             | N/A             | N             |
| 4432 | M   | 35  | N     |          | Y           | 30                       | 12                               | N                 |                   |                           |               | None    | N/A             | N/A             | N             |
| 1452 | M   | 38  | N     |          | Y           | 42                       | 15                               | N                 |                   |                           |               | None    | N/A             | N/A             | N             |
| 1674 | F   | 53  | N     |          | Y           | 39                       | 84                               | N                 |                   |                           |               | None    | N/A             | N/A             | N             |
| 2998 | F   | 29  | N     |          | Y           | 42                       | 49                               | N                 |                   |                           |               | None    | N/A             | N/A             | N             |
| 3959 | M   | 30  | N     |          | Y           | 36                       | 92                               | N                 |                   |                           |               | None    | N/A             | N/A             | N             |
| 2799 | M   | 34  | N     |          | Y           | 25                       | 19                               | N                 |                   |                           |               | None    | N/A             | N/A             | N             |
| 7673 | M   | 26  | N     |          | Y           | 42                       | 61                               | N                 |                   |                           |               | None    | N/A             | N/A             | N             |
| 2960 | M   | 42  | N     |          | Y           | 21                       | 139                              | N                 |                   |                           |               | None    | N/A             | N/A             | N             |
| 1694 | M   | 50  | N     |          | Y           | 43                       | 81                               | N                 |                   |                           |               | None    | N/A             | N/A             | N             |
| 3830 | M   | 52  | N     |          | Y           | 49                       | 76                               | N                 |                   |                           |               | None    | N/A             | N/A             | N             |
| 1657 | M   | 53  | N     |          | Y           | 42                       | 99                               | N                 |                   |                           |               | None    | N/A             | N/A             | N             |
| 2974 | M   | 24  | N     |          | Y           | 42                       | 58                               | N                 |                   |                           |               | None    | N/A             | N/A             | N             |
| 1827 | M   | 27  | N     |          | Y           | 24                       | 72                               | N                 |                   |                           |               | None    | N/A             | N/A             | N             |

| ID   | Sex | Age | COVID | Severity | Vaccination | Days between doses | Days post Boost/ Infection | HIV- Infection | Years infected | Years under therapy | Viral load | Therapy          | CD4+ T-cells | CD8+ T-cells | Comorbidities       |
|------|-----|-----|-------|----------|-------------|--------------------|----------------------------|----------------|----------------|---------------------|------------|------------------|--------------|--------------|---------------------|
| 7864 | F   | 27  | N     |          | Y           | 42                 | 48                         | N              |                |                     |            | None             | N/A          | N/A          | N                   |
| 530  | M   | 32  | N     |          | Y           | 23                 | 16                         | N              |                |                     |            | None             | N/A          | N/A          | N                   |
| 273  | F   | 50  | N     |          | Y           | 22                 | 25                         | N              |                |                     |            | None             | N/A          | N/A          | N                   |
| 487  | M   | 23  | N     |          | Y           | 27                 | 14                         | N              |                |                     |            | None             | N/A          | N/A          | N                   |
| 23   | F   | 53  | N     |          | Y           | 21                 | 15                         | N              |                |                     |            | None             | N/A          | N/A          | N                   |
| 538  | M   | 41  | N     |          | Y           | 23                 | 20                         | Y              | 7              | 7                   | <20        | DOR, DTG, ABC    | 831          | 773          | CKD, DM1, HyT       |
| 469  | M   | 72  | N     |          | Y           | 40                 | 10                         | Y              | 24             | 24                  | 20         | AZV, ABC/3TC     | 910          | 550          | DM2                 |
| 305  | M   | 59  | N     |          | Y           | 21                 | 41                         | Y              | 10             | 10                  | <20        | FTC/TAF/BIC      | 257          | 588          | COPD, HyT, PAOD, PF |
| 562  | M   | 37  | N     |          | Y           | 21                 | 50                         | Y              | 12             | 9                   | 20         | ABC/3TC/DTG      | 1488         | 1410         | D                   |
| 563  | M   | 47  | N     |          | Y           | 21                 | 50                         | Y              | 9              | 8                   | 20         | ABC/3TC/DTG      | 1240         | 389          | N                   |
| 141  | F   | 55  | N     |          | Y           | 40                 | 42                         | Y              | 36             | 30                  | <20        | DRV,RTV, DTG/RPV | 558          | 279          | ACL, LF             |
| 143  | F   | 24  | N     |          | Y           | 42                 | 7                          | Y              | 2              | 2                   | <20        | FTC/TDF,RAL      | 868          | 620          | N                   |
| 183  | M   | 62  | N     |          | Y           | 42                 | 14                         | Y              | 19             | 19                  | <20        | ABC/3TC/DTG      | 671          | 373          | DM2                 |
| 462  | M   | 30  | N     |          | Y           | 26                 | 55                         | Y              | 3              | 3                   | <20        | FTC/TAF/COB /DRV | 329          | 726          | N                   |
| 340  | M   | 51  | N     |          | Y           | 42                 | 13                         | Y              | 12             | 12                  | <20        | 3TC/DTG          | 970          | 891          | N                   |
| 571  | M   | 46  | N     |          | Y           | 42                 | 39                         | Y              | 5              | 5                   | 20         | FTC/TAF/BIC      | 512          | 351          | N                   |
| 329  | M   | 36  | N     |          | Y           | 42                 | 36                         | Y              | 11             | 5                   | 20         | ABC/3TC/DTG      | 792          | 815          | N                   |

| ID  | Sex | Age | COVID | Severity | Vaccination | Days between doses | Days post Boost/ Infection | HIV- Infection | Years infected | Years under therapy | Viral load | Therapy               | CD4+ T-cells | CD8+ T-cells | Comorbidities |
|-----|-----|-----|-------|----------|-------------|--------------------|----------------------------|----------------|----------------|---------------------|------------|-----------------------|--------------|--------------|---------------|
| 65  | M   | 55  | N     |          | Y           | 42                 | 21                         | Y              | 7              | 7                   | 20         | FTC/TDF, EFV          | 1058         | 595          | N             |
| 119 | M   | 53  | N     |          | Y           | 49                 | 28                         | Y              | 18             | 14                  | <20        | FTC/TAF/BIC           | 1014         | 1201         | N             |
| 154 | M   | 53  | N     |          | Y           | 42                 | 36                         | Y              | 13             | 13                  | 40         | FTC/TAF/BIC           | 351          | 628          | D             |
| 336 | M   | 35  | N     |          | Y           | 42                 | 30                         | Y              | 8              | 8                   | 20         | FTC/TAF/COB /DRV, DTG | 946          | 1270         | N             |
| 509 | M   | 53  | N     |          | Y           | 41                 | 23                         | Y              | 5              | 5                   | 20         | FTC/TAF/BIC           | 471          | 656          | N             |
| 323 | F   | 45  | N     |          | Y           | 21                 | 11                         | Y              | 19             | 19                  | <20        | FTC/TDF, DTG          | 342          | 270          | N             |
| 485 | M   | 51  | N     |          | Y           | 42                 | 30                         | Y              | 27             | 27                  | <20        | ATV,COB,ETR ,RAL      | 740          | 648          | N             |
| 158 | F   | 54  | N     |          | Y           | 42                 | 48                         | Y              | 27             | 27                  | <20        | 3TC/DTG,DRV ,RTV      | 877          | 292          | N             |
| 239 | F   | 51  | N     |          | Y           | 41                 | 62                         | Y              | 7              | 7                   | <20        | FTC/TAF/COB /DRV      | 286          | 504          | N             |
| 46  | M   | 56  | N     |          | Y           | 42                 | 77                         | Y              | 4              | 4                   | <20        | ABC/3TC/DTG           | 529          | 597          | N             |
| 216 | M   | 58  | N     |          | Y           | 42                 | 88                         | Y              | 4              | 4                   | 20         | FTC/TAF/BIC           | 847          | 512          | HyT           |
| 375 | F   | 58  | N     |          | Y           | 42                 | 47                         | Y              | 7              | 7                   | 50         | ABC/3TC/DTG           | 372          | 713          | N             |
| 382 | F   | 59  | N     |          | Y           | 42                 | 46                         | Y              | 35             | 22                  | <20        | ABC/3TC, EFV          | 1548         | 760          | HyT, OUD      |
| 384 | F   | 63  | N     |          | Y           | 44                 | 52                         | Y              | 18             | 12                  | 20         | FTC, RAL, AZV         | 892          | 708          | N             |
| 349 | F   | 58  | N     |          | Y           | 35                 | 50                         | Y              | 18             | 18                  | <20        | FTC/TAF/BIC           | 503          | 755          | D             |
| 584 | F   | 57  | N     |          | Y           | 48                 | 28                         | Y              | 16             | 16                  | 20         | FTC/TAF/COB /DRV      | 923          | 1169         | N             |
| 303 | F   | 36  | N     |          | Y           | 42                 | 24                         | Y              | 5              | 5                   | <20        | FTC/TAF/COB /DRV      | 570          | 585          | HepB          |

| ID  | Sex | Age | COVID | Severity | Vaccination | Days between doses | Days post Boost/ Infection | HIV- Infection | Years infected | Years under therapy | Viral load | Therapy      | CD4+ T-cells | CD8+ T-cells | Comorbidities |
|-----|-----|-----|-------|----------|-------------|--------------------|----------------------------|----------------|----------------|---------------------|------------|--------------|--------------|--------------|---------------|
| 298 | F   | 62  | N     |          | Y           | 45                 | 38                         | Y              | 2              | 2                   | 20         | FTC/TDF, RAL | 701          | 298          | D             |
| 404 | F   | 55  | N     |          | Y           | 28                 | 30                         | Y              | 20             | 20                  | 60         | ABC/3TC/DTG  | 1182         | 719          | A, LC, P      |
| 3   | M   | 61  | Y     | 2        | N           |                    | 23                         | N              |                |                     |            | None         | N/A          | N/A          | N             |
| 12  | F   | 65  | Y     | 2        | N           |                    | 28                         | N              |                |                     |            | None         | N/A          | N/A          | N             |
| 25  | M   | 67  | Y     | 2        | N           |                    | 28                         | N              |                |                     |            | None         | N/A          | N/A          | N             |
| 32  | M   | 66  | Y     | 4        | N           |                    | 13                         | N              |                |                     |            | None         | N/A          | N/A          | N             |
| 33  | F   | 48  | Y     | 4        | N           |                    | 7                          | N              |                |                     |            | None         | N/A          | N/A          | N             |
| 38  | F   | 50  | Y     | 3        | N           |                    | 16                         | N              |                |                     |            | None         | N/A          | N/A          | N             |
| 17  | F   | 40  | Y     | 2        | N           |                    | 20                         | N              |                |                     |            | None         | N/A          | N/A          | N             |
| 255 | M   | 56  | Y     | 3        | N           |                    | 53                         | N              |                |                     |            | None         | N/A          | N/A          | N             |
| 585 | M   | 35  | Y     | 2        | N           |                    | 240                        | N              |                |                     |            | None         | N/A          | N/A          | N             |
| 140 | M   | 55  | Y     | 3        | N           |                    | 31                         | Y              | 6              | 5                   | <20        | FTC/TAF/BIC  | 1034         | 643          | N             |
| 62  | M   | 59  | Y     | 1        | N           |                    | 116                        | Y              | 12             | 12                  | <20        | FTC/TAF/BIC  | 526          | 321          | N             |
| 221 | M   | 57  | Y     | 1        | N           |                    | 63                         | Y              | 9              | 9                   | <20        | FTC/TAF/BIC  | 1186         | 616          | N             |
| 229 | F   | 39  | Y     | 3        | N           |                    | 46                         | Y              | 15             | 12                  | <20        | FTC/TAF/RPV  | 859          | 586          | ET            |
| 257 | F   | 43  | Y     | 3        | N           |                    | 29                         | Y              | 29             | 9                   | 20         | 3TC/DTG      | 743          | 963          | N             |
| 109 | F   | 31  | Y     | 2        | N           |                    | 27                         | Y              | 3              | 3                   | <20        | DTG, FTC/TDF | 605          | 490          | N             |

| ID  | Sex | Age | COVID | Severity | Vaccination | Days between doses | Days post Boost/ Infection | HIV- Infection | Years infected | Years under therapy | Viral load | Therapy           | CD4+ T-cells | CD8+ T-cells | Comorbidities         |
|-----|-----|-----|-------|----------|-------------|--------------------|----------------------------|----------------|----------------|---------------------|------------|-------------------|--------------|--------------|-----------------------|
| 261 | M   | 43  | Y     | 3        | N           |                    | 77                         | Y              | 8              | 8                   | <20        | FTC/TDF/RPV       | 940          | 685          | N                     |
| 510 | M   | 43  | Y     | 2        | N           |                    | 187                        | Y              | 17             | 6                   | 20         | FTC/TDF, DTG      | 708          | 578          | N                     |
| 51  | M   | 57  | Y     | 3        | N           |                    | 42                         | Y              | 6              | 6                   | <20        | FTC/TAF/COB /EVG  | 322          | 936          | N                     |
| 231 | F   | 38  | Y     | 2        | N           |                    | 34                         | Y              | 13             | 1                   | <20        | DRV, RTV, FTC/TDF | 738          | 643          | N                     |
| 148 | M   | 62  | Y     | 3        | N           |                    | 28                         | Y              | 15             | 15                  | <20        | FTC/TAF/COB /EVG  | 415          | 741          | CHD, CKD, N, LF, PAOD |
| 586 | M   | 41  | Y     | 1        | N           |                    | 264                        | Y              | 6              | 6                   | 20         | FTC/TAF/BIC       | 393          | 1023         | N                     |
| 406 | F   | 63  | Y     | 3        | N           |                    | 95                         | Y              | 11             | 8                   | <20        | FTC/TAF/BIC       | 1324         | 395          | N                     |

<sup>1</sup>No Comorbidities stated for all healthy controls.

Abbreviations: M: male, F: female, N: No, Y: Yes, N/A: None available, Severity: 1 = Asymptomatic, 2 = Mild, 3 = Moderate, 4 = Severe (Hospitalization), A: Alcoholism, AA: Allergic asthma, ACL: Adenocarcinoma of the lung, AF: Atrial fibrillation, ASCT: Autologous stem cell transplantation, BL: B-cell lymphocytosis, CC: Chondrocalcinosis, CDK: Chronic kidney disease, CHD: Coronary heart disease, COPD: Chronic obstructive pulmonary disease, CT: Cyclothymia, D: Depression, DM1: Diabetes mellitus type 1, DM2: Diabetes mellitus type 2, ET: Essential thrombocythemia (untreated), HbH: Hemoglobin H disease with hemolytic anemia, HepB: Hepatitis B (treated), HPT: Hyperparathyroidism, HyT: Hypothyroidism, LC: Liver cirrhosis, LCpH: Liver cirrhosis post Hepatitis C, LF: Liver fibrosis, OUD: Opioid use disorder, P: Psoriasis, PAOD: Peripheral artery occlusive disease, PCBCL: Primary cerebral B-cell lymphoma, PF: Pulmonary fibrosis, SA: sleep apnea.
