# Supplementary material for: Characterization of Serum and Mucosal SARS-CoV-2-Antibodies in HIV-1-Infected Subjects after BNT162b2 mRNA Vaccination or SARS-CoV-2 Infection
Source: Viruses. 2022 Mar 21;14(3):651. doi: 10.3390/v14030651 (PMC8952283; doi:10.3390/v14030651)
Supplement: Supplementary file 1 [file viruses-14-00651-s001.zip › Suppl. Table S2.pdf]

**Supplementary Table S2.** Serum anti-spike IgA and IgG levels.

|                                     | <b>IgG</b>                 | <b>IgA</b>    |
|-------------------------------------|----------------------------|---------------|
| <b>SARS-CoV-2 NI (n=6)</b>          | 0.2 (0.1-0.4) <sup>1</sup> | 0.4 (0.1-0.8) |
| <b>Vaccinated HU (n=61)</b>         | 8.6 (7.7-9.5)              | 7.4 (4.5-8.4) |
| <b>Vaccinated HIV (n=50)</b>        | 8.0 (7.2-8.8)              | 5.8 (2.9-8.3) |
| <b>COVID HU (n=17)</b>              | 3.9 (2.6-6.0)              | 4.0 (2.5-7.6) |
| <b>COVID HIV (n=26)</b>             | 3.9 (2.2-6.6)              | 3.2 (1.5-6.7) |
| <b>P value vaccinated vs. COVID</b> |                            |               |
| <b>HU</b>                           | <0.0001                    | 0.023         |
| <b>HIV</b>                          | <0.0001                    | 0.086         |
| <b>P value HU vs. HIV</b>           |                            |               |
| <b>Vaccinated</b>                   | 0.028                      | 0.077         |
| <b>COVID</b>                        | 0.816                      | 0.522         |

<sup>1</sup> Shown are medians with IQRs in brackets of serum anti-spike IgG and IgA ratios. NI: non-immune, HU: HIV-1-uninfected. HIV: HIV-1-infected. A ratio of <0.8 was considered as negative, a ratio of 0.8-1.1 as borderline and ≥1.1 as positive. Significance was tested by Mann-Whitney-U test. All vaccinated and convalescent groups had significantly higher IgG- (p≤0.0001) and IgA-ratios (p≤0.0009) compared to the NI group.
