# Supplementary material for: Characterization of Serum and Mucosal SARS-CoV-2-Antibodies in HIV-1-Infected Subjects after BNT162b2 mRNA Vaccination or SARS-CoV-2 Infection
Source: Viruses. 2022 Mar 21;14(3):651. doi: 10.3390/v14030651 (PMC8952283; doi:10.3390/v14030651)
Supplement: Supplementary file 1 [file viruses-14-00651-s001.zip › Suppl. Table S3.pdf]

**Supplementary Table S3.** Neutralizing activity (NA) in serum at 1:5 and 1:101 dilution.

|                                     | <b>n 1:5</b> | <b>NA 1:5</b>                | <b>n 1:101</b> | <b>NA 1:101</b>   |
|-------------------------------------|--------------|------------------------------|----------------|-------------------|
| <b>SARS-CoV-2 NI</b>                | 6            | 0.0% (0.0-9.6%) <sup>1</sup> | 6              | /                 |
| <b>Vaccinated HU</b>                | 57           | 99.0% (97.6-99.4%)           | 60             | 30.0% (4.1-62.3%) |
| <b>Vaccinated HIV</b>               | 50           | 98.7% (92.2-99.4 %)          | 50             | 11.9% (0.0-43.4%) |
| <b>COVID HU</b>                     | 16           | 48.7% (17.0-71.3%)           | 17             | /                 |
| <b>COVID HIV</b>                    | 24           | 46.9% (15.8-83.1%)           | 26             | /                 |
| <b>P value vaccinated vs. COVID</b> |              |                              |                |                   |
| <b>HU</b>                           |              | <0.0001                      |                | /                 |
| <b>HIV</b>                          |              | <0.0001                      |                | /                 |
| <b>P value HU vs. HIV</b>           |              |                              |                |                   |
| <b>Vaccinated</b>                   |              | 0.416                        |                | 0.031             |
| <b>COVID</b>                        |              | 0.733                        |                | /                 |

<sup>1</sup> Shown are medians with IQRs in brackets of neutralizing activity in serum. NI: non-immune, HU: HIV-1-uninfected. An inhibition of <20% was considered negative, an inhibition of 20-35% as borderline and ≥35% as positive. All vaccinated and convalescent groups showed significantly higher neutralizing activity compared to the NI group (p≤0.001).
