# Supplementary material for: Characterization of Serum and Mucosal SARS-CoV-2-Antibodies in HIV-1-Infected Subjects after BNT162b2 mRNA Vaccination or SARS-CoV-2 Infection
Source: Viruses. 2022 Mar 21;14(3):651. doi: 10.3390/v14030651 (PMC8952283; doi:10.3390/v14030651)
Supplement: Supplementary file 1 [file viruses-14-00651-s001.zip › Suppl. Table S4.pdf]

**Suppl. Table S4:** Multivariate linear regression analysis of serum spike-specific neutralizing antibody levels of SARS-CoV-2 vaccinated subjects compared to COVID-19 convalescent subjects

| Variable                     | Vaccinated HU             |         | Vaccinated HIV            |         |
|------------------------------|---------------------------|---------|---------------------------|---------|
|                              | Estimates (95% CI)        | p value | Estimates (95% CI)        | p value |
| (Intercept)                  | 94.05 (87.86 to 100.23)   | <0.0001 | 94.06 (87.89 to 100.23)   | <0.0001 |
| Age, per decade              | -2.50 (-5.16 to 0.16)     | 0.065   | -2.50 (-5.16 to 0.16)     | 0.065   |
| COVID HU                     | -44.93 (-56.11 to -33.75) | <0.0001 | -44.94 (-56.34 to -33.54) | <0.0001 |
| COVID HIV                    | -37.67 (-47.88 to -27.45) | <0.0001 | 44.94 (-56.34 to -33.54)  | <0.0001 |
| Female gender                | 2.02 (-4.79 to 8.82)      | 0.559   | 2.02 (-4.79 to 8.82)      | 0.559   |
| Time after vaccine, per week | -0.87 (-1.42 to -0.33)    | 0.002   | -0.87 (-1.42 to -0.33)    | 0.002   |
