# Supplementary material for: Characterization of Serum and Mucosal SARS-CoV-2-Antibodies in HIV-1-Infected Subjects after BNT162b2 mRNA Vaccination or SARS-CoV-2 Infection
Source: Viruses. 2022 Mar 21;14(3):651. doi: 10.3390/v14030651 (PMC8952283; doi:10.3390/v14030651)
Supplement: Supplementary file 1 [file viruses-14-00651-s001.zip › Suppl. Table S5.pdf]

**Supplementary Table S5.** Saliva anti-spike IgA and IgG levels.

|                                     | <b>IgA</b>                 | <b>Normalized IgA</b> | <b>IgG</b>    | <b>Normalized IgG</b> |
|-------------------------------------|----------------------------|-----------------------|---------------|-----------------------|
| <b>SARS-CoV-2 NI (n = 6)</b>        | 0.4 (0.1-0.6) <sup>1</sup> | 0.1 (0.0-0.1)         | 0.1 (0.1-0.1) | 0.1 (0.0-0.1)         |
| <b>Vaccinated HU (n = 15)</b>       | 0.6 (0.4-1.9)              | 0.9 (0.3-1.3)         | 0.5 (0.4-1.3) | 0.4 (0.2-1.3)         |
| <b>Vaccinated HIV (n = 19)</b>      | 0.5 (0.3-1.3)              | 0.3 (0.2-0.8)         | 0.4 (0.2-0.6) | 0.3 (0.2-0.4)         |
| <b>COVID HU (n = 8)</b>             | 1.2 (0.5-1.7)              | 0.9 (0.5-1.4)         | 0.2 (0.1-0.4) | 0.1 (0.1-0.4)         |
| <b>COVID HIV (n = 13)</b>           | 1.6 (0.8-2.9)              | 0.8 (0.3-1.2)         | 0.2 (0.1-0.5) | 0.1 (0.0-0.2)         |
| <b>P value HU vs. HIV</b>           |                            |                       |               |                       |
| <b>Vaccinated</b>                   | 0.554                      | 0.073                 | 0.225         | 0.036                 |
| <b>COVID</b>                        | 0.310                      | 0.500                 | 0.790         | 0.310                 |
| <b>P value Vaccinated vs. COVID</b> |                            |                       |               |                       |
| <b>HU</b>                           | 0.789                      | 0.548                 | 0.020         | 0.024                 |
| <b>HIV</b>                          | 0.059                      | 0.211                 | 0.070         | 0.001                 |

<sup>1</sup> Shown are medians with IQRs in brackets of spike-specific IgA and IgG levels given as antibody ratios obtained by dividing the extinction of the sample by that of the calibrator. NI: non-immune, HU: HIV-1-uninfected. A ratio of <0.8 was considered as negative, a ratio of 0.8-1.1 as borderline and ≥1.1 as positive. Significance was tested by Mann-Whitney-U tests.
