# Supplementary material for: Characterization of Serum and Mucosal SARS-CoV-2-Antibodies in HIV-1-Infected Subjects after BNT162b2 mRNA Vaccination or SARS-CoV-2 Infection
Source: Viruses. 2022 Mar 21;14(3):651. doi: 10.3390/v14030651 (PMC8952283; doi:10.3390/v14030651)
Supplement: Supplementary file 1 [file viruses-14-00651-s001.zip › Suppl. Table S6.pdf]

**Supplementary Table S6: Raw ELISA data**

| ID  | Sample | IgG Ratio | IgA Ratio | % Inhibition |
|-----|--------|-----------|-----------|--------------|
| 224 | Serum  | 0.2       | 0.2       | 0.0          |
|     | Saliva | 0.1       | 0.6       | 5.6          |
| 539 | Serum  | 0.3       | 0.4       | 10.8         |
|     | Saliva | 0.1       | 0.1       | 21.0         |
| 93  | Serum  | 0.6       | 0.4       | 0.0          |
|     | Saliva | 0.1       | 0.6       | 0.0          |
| 540 | Serum  | 0.1       | 1.9       | 0.0          |
|     | Saliva | 0.1       | 0.1       | 2.2          |
| 356 | Serum  | 0.1       | 0.1       | 9.6          |
|     | Saliva | 0.1       | 0.3       | 2.3          |
| 70  | Serum  | 0.1       | 0.4       | 0.0          |
|     | Saliva | 0.1       | 0.6       | 16.7         |
| 254 | Serum  | 8.4       | 4.0       | 99.4         |
|     | Saliva | 1.0       | 1.0       | 15.6         |
| 264 | Serum  | 9.7       | 12.2      | 99.4         |
|     | Saliva | 4.0       | 4.3       | 24.6         |
| 269 | Serum  | 9.9       | 7.5       | 99.1         |
|     | Saliva | 1.3       | 1.6       | 8.0          |
| 265 | Serum  | 9.1       | 7.4       | 98.5         |
|     | Saliva | 0.2       | 0.5       | 8.7          |
| 268 | Serum  | 9.5       | 7.4       | 99.3         |
|     | Saliva | 1.6       | 3.9       | 20.2         |
| 266 | Serum  | 9.5       | 7.0       | 99.5         |
|     | Saliva | 1.1       | 1.9       | 0.0          |
| 267 | Serum  | 10.6      | 7.3       | 99.7         |
|     | Saliva | 0.4       | 0.4       | 0.0          |
| 271 | Serum  | 10.2      | 7.4       | 99.8         |
|     | Saliva | 5.3       | 5.4       | 10.0         |
| 270 | Serum  | 8.2       | 1.6       | 94.0         |
|     | Saliva | 0.0       | 0.4       | 0.0          |
| 6   | Serum  | 9.2       | 7.4       | 99.0         |
|     | Saliva | 0.4       | 0.3       | 5.8          |

|     |        |      |      |      |
|-----|--------|------|------|------|
| 272 | Serum  | 9.8  | 4.4  | 98.4 |
|     | Saliva | 0.4  | 0.6  | 24.7 |
| 8   | Serum  | 9.4  | 5.8  | 99.0 |
|     | Saliva | 0.7  | 0.5  | 5.4  |
| 5   | Serum  | 8.5  | 4.7  | 97.8 |
|     | Saliva | 0.2  | 0.3  | 1.9  |
| 15  | Serum  | 8.1  | 6.1  | 93.6 |
|     | Saliva | 0.5  | 0.4  | 5.0  |
| 22  | Serum  | 9.7  | 3.2  | 90.0 |
|     | Saliva | 0.4  | 0.6  | 10.2 |
| 526 | Serum  | 7.9  | 1.8  | 97.2 |
|     | Saliva | 2.3  | 1.3  | 0.0  |
| 56  | Serum  | 6.9  | 1.7  | 94.0 |
|     | Saliva | 0.4  | 0.4  | 0.0  |
| 74  | Serum  | 8.3  | 1.3  | 96.9 |
|     | Saliva | 0.2  | 0.3  | 0.0  |
| 232 | Serum  | 10.9 | 4.5  | 99.8 |
|     | Saliva | 5.6  | 7.8  | 4.7  |
| 383 | Serum  | 8.7  | 3.0  | 98.6 |
|     | Saliva | 0.6  | 0.5  | 0.0  |
| 275 | Serum  | 7.5  | 6.2  | 92.5 |
|     | Saliva | 0.3  | 0.7  | 16.2 |
| 420 | Serum  | 5.1  | 8.4  | 63.8 |
|     | Saliva | 0.1  | 0.6  | 38.5 |
| 45  | Serum  | 7.6  | 11.9 | 99.3 |
|     | Saliva | 0.5  | 0.5  | 0.0  |
| 496 | Serum  | 7.2  | 2.2  | 90.0 |
|     | Saliva | 0.3  | 0.8  | 0.0  |
| 240 | Serum  | 9.1  | 11.1 | 99.4 |
|     | Saliva | 0.5  | 3.3  | 6.5  |
| 503 | Serum  | 7.4  | 2.7  | 87.1 |
|     | Saliva | 0.2  | 0.2  | 21.5 |
| 98  | Serum  | 7.5  | 7.0  | 99.1 |
|     | Saliva | 0.1  | 0.3  | 25.4 |
| 390 | Serum  | 5.9  | 1.5  | 88.6 |

|     |        |      |     |      |
|-----|--------|------|-----|------|
|     | Saliva | 0.6  | 1.4 | 3.3  |
| 289 | Serum  | 10.3 | 8.1 | 98.4 |
|     | Saliva | 0.2  | 0.3 | 1.0  |
| 436 | Serum  | 8.0  | 2.5 | 94.6 |
|     | Saliva | 0.8  | 0.6 | 0.0  |
| 396 | Serum  | 7.2  | 2.5 | 95.9 |
|     | Saliva | 0.8  | 0.4 | 14.7 |
| 218 | Serum  | 7.5  | 5.0 | 99.0 |
|     | Saliva | 0.2  | 0.5 | 17.9 |
| 297 | Serum  | 8.5  | 3.5 | 97.9 |
|     | Saliva | 0.4  | 1.6 | 15.8 |
| 441 | Serum  | 4.6  | 2.7 | 69.4 |
|     | Saliva | 0.2  | 0.4 | 7.4  |
| 256 | Serum  | 3.0  | 2.6 | 64.6 |
|     | Saliva | 0.3  | 2.6 | 0.0  |
| 263 | Serum  | 2.6  | 3.5 | 58.2 |
|     | Saliva | 1.0  | 1.8 | 0.0  |
| 565 | Serum  | 5.4  | 4.0 | 78.8 |
|     | Saliva | 0.1  | 1.0 | 3.2  |
| 566 | Serum  | 2.7  | 3.3 | 39.8 |
|     | Saliva | 0.1  | 1.3 | 23.3 |
| 567 | Serum  | 5.5  | 2.5 | 34.0 |
|     | Saliva | 0.1  | 1.1 | 30.9 |
| 307 | Serum  | 3.5  | 1.9 | 16.8 |
|     | Saliva | 0.1  | 0.3 | 14.0 |
| 568 | Serum  | 9.1  | 9.7 | 96.7 |
|     | Saliva | 0.4  | 1.2 | 0.0  |
| 569 | Serum  | 3.9  | 1.7 | 51.9 |
|     | Saliva | 0.2  | 0.2 | 0.0  |
| 113 | Serum  | 1.3  | 0.3 | 0.0  |
|     | Saliva | 0.1  | 0.2 | 0.8  |
| 334 | Serum  | 2.5  | 7.9 | 47.7 |
|     | Saliva | 0.1  | 1.1 | 7.3  |
| 532 | Serum  | 1.3  | 0.4 | 14.7 |
|     | Saliva | 0.1  | 0.5 | 5.8  |

|     |        |      |      |      |
|-----|--------|------|------|------|
| 501 | Serum  | 5.0  | 3.2  | 93.7 |
|     | Saliva | 1.5  | 6.2  | 20.4 |
| 230 | Serum  | 6.9  | 5.2  | 97.7 |
|     | Saliva | 0.5  | 1.5  | 9.9  |
| 120 | Serum  | 2.4  | 2.4  | 46.1 |
|     | Saliva | 0.1  | 1.0  | 1.1  |
| 178 | Serum  | 0.6  | 0.4  | 8.5  |
|     | Saliva | 0.0  | 0.3  | 0.0  |
| 492 | Serum  | 4.4  | 2.5  | 66.6 |
|     | Saliva | 0.1  | 1.6  | 5.5  |
| 491 | Serum  | 7.2  | 5.4  | 99.4 |
|     | Saliva | 0.5  | 2.7  | 9.7  |
| 422 | Serum  | 6.6  | 7.0  | 88.3 |
|     | Saliva | 0.5  | 3.4  | 0.0  |
| 552 | Serum  | 4.0  | 4.1  | 56.0 |
|     | Saliva | 0.2  | 2.0  | 23.1 |
| 260 | Serum  | 3.7  | 3.3  | 40.8 |
|     | Saliva | 0.3  | 2.1  | 4.5  |
| 564 | Serum  | 6.7  | 7.7  | 82.5 |
|     | Saliva | 0.3  | 3.2  | 17.5 |
| 1   | Serum  | 8.4  | 10.0 | 99.5 |
| 247 | Serum  | 7.6  | 10.4 | 99.6 |
| 248 | Serum  | 7.7  | 10.3 | 99.6 |
| 251 | Serum  | 8.6  | 10.3 | 99.4 |
| 252 | Serum  | 9.6  | 8.2  | 99.8 |
| 9   | Serum  | 9.7  | 8.0  | 98.6 |
| 514 | Serum  | 10.2 | 9.2  | 98.9 |
| 516 | Serum  | 8.2  | 1.3  | 95.9 |
| 517 | Serum  | 8.6  | 3.0  | 95.1 |
| 528 | Serum  | 9.1  | 10.3 | 98.4 |
| 475 | Serum  | 10.8 | 9.0  | 99.1 |
| 580 | Serum  | 6.8  | 9.9  | 98.5 |

|      |       |      |     |      |
|------|-------|------|-----|------|
| 4083 | Serum | 9.5  | 8.5 | 99.6 |
| 4439 | Serum | 8.2  | 7.7 | 99.2 |
| 3012 | Serum | 8.8  | 4.4 | 99.1 |
| 3865 | Serum | 7.8  | 8.1 | 98.6 |
| 3815 | Serum | 6.3  | 7.1 | 84.5 |
| 4402 | Serum | 3.8  | 0.5 | 40.7 |
| 2918 | Serum | 9.1  | 8.8 | 99.4 |
| 4628 | Serum | 8.9  | 5.5 | 98.4 |
| 908  | Serum | 7.0  | 7.0 | 97.8 |
| 3827 | Serum | 7.1  | 3.9 | 87.1 |
| 89   | Serum | 3.0  | 3.8 | 34.9 |
| 770  | Serum | 10.5 | 8.3 | 99.6 |
| 773  | Serum | 12.6 | 5.2 | 99.3 |
| 781  | Serum | 10.3 | 3.4 | 99.0 |
| 9240 | Serum | 6.2  | 4.7 | 89.3 |
| 4432 | Serum | 9.6  | 8.4 | 98.3 |
| 1452 | Serum | 7.1  | 8.3 | 99.2 |
| 1674 | Serum | 8.1  | 5.0 | 98.3 |
| 2998 | Serum | 9.3  | 3.7 | 99.3 |
| 3959 | Serum | 8.8  | 8.3 | 99.4 |
| 2799 | Serum | 8.2  | 8.6 | 97.2 |
| 7673 | Serum | 8.8  | 8.3 | 99.6 |
| 2960 | Serum | 8.0  | 3.3 | 98.2 |
| 1694 | Serum | 7.5  | 8.2 | 98.4 |
| 3830 | Serum | 8.3  | 8.4 | 99.6 |
| 1657 | Serum | 5.2  | 1.6 | 88.1 |
| 2974 | Serum | 9.0  | 5.0 | 99.4 |
| 1827 | Serum | 7.8  | 7.0 | N/A  |
| 7864 | Serum | 7.3  | 5.8 | N/A  |
| 530  | Serum | 5.9  | 8.6 | N/A  |

|     |       |      |      |       |
|-----|-------|------|------|-------|
| 273 | Serum | 6.8  | 5.6  | 97.4  |
| 487 | Serum | 9.2  | 0.0  | 97.3  |
| 23  | Serum | 8.3  | 10.0 | 99.2  |
| 538 | Serum | 10.1 | 2.9  | 99.3  |
| 469 | Serum | 8.3  | 10.3 | 99.4  |
| 305 | Serum | 3.7  | 8.0  | 32.4  |
| 562 | Serum | 7.0  | 3.0  | 97.1  |
| 563 | Serum | 5.5  | 4.0  | 94.2  |
| 141 | Serum | 8.3  | 8.3  | 99.6  |
| 143 | Serum | 9.0  | 9.4  | 99.6  |
| 183 | Serum | 9.0  | 9.7  | 99.9  |
| 462 | Serum | 8.2  | 6.3  | 98.5  |
| 340 | Serum | 8.5  | 6.0  | 99.4  |
| 571 | Serum | 8.1  | 6.6  | 99.1  |
| 329 | Serum | 9.1  | 8.7  | 99.4  |
| 65  | Serum | 9.4  | 10.0 | 99.9  |
| 119 | Serum | 8.7  | 5.5  | 98.7  |
| 154 | Serum | 5.0  | 3.0  | 71.4  |
| 336 | Serum | 9.4  | 7.4  | 99.2  |
| 509 | Serum | 9.3  | 8.4  | 100.0 |
| 323 | Serum | 8.6  | 10.3 | 99.2  |
| 485 | Serum | 7.6  | 6.3  | 98.7  |
| 158 | Serum | 8.0  | 8.5  | 96.3  |
| 239 | Serum | 6.8  | 2.6  | 99.4  |
| 46  | Serum | 5.0  | 0.7  | 59.9  |
| 216 | Serum | 7.6  | 3.9  | 91.3  |
| 375 | Serum | 8.4  | 5.9  | 99.7  |
| 382 | Serum | 6.1  | 1.7  | 75.1  |
| 384 | Serum | 8.5  | 6.0  | 99.7  |
| 349 | Serum | 7.2  | 3.2  | 89.3  |

|     |       |      |      |      |
|-----|-------|------|------|------|
| 584 | Serum | 10.5 | 6.3  | 99.5 |
| 303 | Serum | 10.1 | 8.5  | 99.9 |
| 298 | Serum | 7.7  | 5.7  | 79.3 |
| 404 | Serum | 8.6  | 5.1  | 99.1 |
| 3   | Serum | 5.3  | 3.4  | 17.8 |
| 12  | Serum | 5.8  | 10.0 | 48.3 |
| 25  | Serum | 2.6  | 4.6  | 0.0  |
| 32  | Serum | 6.2  | 7.8  | 49.2 |
| 33  | Serum | 0.3  | 4.6  | 0.0  |
| 38  | Serum | 7.9  | 7.3  | 73.5 |
| 17  | Serum | 2.1  | 8.3  | 12.8 |
| 255 | Serum | 6.9  | 5.5  | 94.4 |
| 585 | Serum | 0.4  | 1.0  | N/A  |
| 140 | Serum | 1.3  | 5.6  | 27.9 |
| 62  | Serum | 1.5  | 1.3  | 0.0  |
| 221 | Serum | 3.2  | 6.2  | 16.3 |
| 229 | Serum | 5.2  | 6.4  | 31.9 |
| 257 | Serum | 10.2 | 10.1 | 97.9 |
| 109 | Serum | 4.9  | 9.9  | 79.9 |
| 261 | Serum | 3.0  | 1.5  | 15.6 |
| 510 | Serum | 1.4  | 1.4  | 0.0  |
| 51  | Serum | 4.1  | 2.80 | 45.6 |
| 231 | Serum | 3.4  | N/A  | N/A  |
| 148 | Serum | 8.3  | 10.2 | 5.2  |
| 586 | Serum | 3.1  | 1.3  | 0.0  |
| 406 | Serum | 6.6  | 3.1  | 0.0  |

Abbreviations: N/A: None available.
